# Supplementary material for: Prevalence and risk factors of Cryptosporidium in humans in China: A systematic review and meta-analysis
Source: Research Square preprint supplement (doi:10.21203/rs.3.rs-7425773/v1), 2025-09-03
Supplement: Supplementary file 1 [file 17bdbd27a8d8443fcdb0f0b9.docx]

**Supplementary Materials**

1. Cai R, Li Z, Wang J, et al. Survey of *Cryptosporidium* infection in diarrheal patients in Huainan. Trop Med Parasitol, 2003, (1): 26–28.
2. Chen H, Li C, Xie M, et al. Relationship between diarrhea patients and intestinal protozoan infections in Fuzhou. Strait Prev Med, 2002, (6): 14–16.
3. Chen H, Mao X, Ling X, et al. Survey of *Cryptosporidium* infection in human populations in three areas of Gansu Province. Chin J Parasitol Parasit Dis, 2001, (2): 50.
4. Chen S, Ai L, Tian L, et al. Fecal sample analysis of *Cryptosporidium* and other protozoan infections in diarrheal patients. Chin J Zoonoses, 2012, 28(8): 815–819.
5. Chen X, Liu J, Li Y, et al. Survey report on *Cryptosporidium* infection in humans in inland Shandong. Endemic Dis Bull, 2002, (4): 44–46. DOI:10.13215/j.cnki.jbyfkztb.2002.04.017
6. Chen X, Su L, Sai S, Yang G, Song J, Tian X. Survey of *Cryptosporidium* infection in humans in southern Shandong. Chin J Parasitol Schistosomiasis Control, 1991, 4(4): 311.
7. Chen Y, Dai M, Yao F. Survey on *Cryptosporidium* infection in the population of Zhoupeng Village, Tongshan County. J Xuzhou Med Univ, 1990, (1): 40–42.
8. Chen Y, Lang S, Li J, et al. Survey of opportunistic parasitic infections in part of the population in Guiyang. Guiyang Med Univ J, 1999, (3): 243–244+248. DOI:10.19367/j.cnki.1000-2707.1999.03.012
9. Chen Y, Li H, Dai M, Yao F, Shi W, Lu M. Epidemiological survey of *Cryptosporidium* infection in humans. Chin J Parasitol Parasit Dis, 1993, 11(3): 207–210.
10. Chen Y, Li H, Dai M, Yao F, Shi W, Lu M. Survey of *Cryptosporidium* infection in urban and rural children in Jiangsu Province. J Xuzhou Med Univ, 1993, 13(1): 1–4.
11. Cheng Y, Chen X, Lin A, et al. 26 cases of *Cryptosporidium* in humans in Hangzhou. Shanghai J Med Lab Sci, 2000, (5): 307.
12. Chu W, Tang H, Zhang Y, et al. Correlation of opportunistic pathogens and CD4+ T lymphocyte count in HIV/AIDS patients. Trop Med J, 2021, 21(3): 352–355.
13. Cui W, Liang R, Wang Z. *Cryptosporidium* infection and epidemiology in children in Weifang. Chin J Reprod Genet, 2001, (2): 114–115+132.
14. Cui W, Liang R, Wang Z. Epidemiological survey of *Cryptosporidium* infection in children in the southern mountainous area of Weifang. J Weifang Med Univ, 2001, (1): 11–12.
15. Cui W, Liang R, Wang Z. Epidemiological survey of *Cryptosporidium* infection in children in Weifang. Chin J Prev Med, 2001, (4): 73.
16. Deng Y, Sun X, Song Z, et al. Investigation of opportunistic intestinal protozoan infections among HIV-infected individuals in Menglian County, Yunnan. Chin J Pathog Biol, 2012, 7(01): 58–60. DOI:10.13350/j.cjpb.2012.01.005.
17. Du X, Ge J, Qin Y, et al. Epidemiological survey of *Cryptosporidium* in children at a pediatric clinic in Nanjing. Trop Med J, 2009, 9(4): 382–385+391.
18. Fan B, He X, Huang Z, et al. Epidemiological survey of cryptosporidiosis in Yuxi. J Med Pest Control, 1992, (04): 228–230.
19. Fan B, He X, Wang W, et al. Survey of *Cryptosporidium* infection in the population in Yuxi County, Yunnan Province. Chin J Parasitol Parasit Dis, 1994, (S1): 265.
20. Feng W, Gu X, Sui W, et al. Application of xTAG GPP multiplex nucleic acid technology in the diagnosis and epidemiological study of infectious diarrhea in Beijing. Chin Med J, 2015, 95(6): 435–439.
21. Feng Y, Wang L, Duan L, Gomez-Puerta LA, Zhang L, Zhao X, Hu J, Zhang N, Xiao L. Extended outbreak of cryptosporidiosis in a pediatric hospital, China. Emerg Infect Dis. 2012 Feb;18(2):312-4. doi: 10.3201/eid1802.110666. PMID: 22305484; PMCID: PMC3310446.
22. Gao B, Fu L, Tian B, et al. Survey and analysis of *Cryptosporidium* infection in children in Chibi City. World Latest Med Inf Digest (Electron Ed), 2014, 14(1): 53–54.
23. Gao Y, Li S, Du X. Pathogen detection analysis of stool specimens from chronic diarrhea HIV patients. Dis Surveil Control, 2021, 15(4): 279–281. DOI:10.19891/j.issn1673-9388.(2021)04-0279-03.
24. Ge J, Shen J, Hu B. Laboratory diagnosis of *Cryptosporidium* enteritis. Shanghai J Med Lab Sci, 1990, 5(2): 65–66.
25. Gong Y, Cao S, Shi X, et al. Survey of *Cryptosporidium* infection in diarrheal patients in Qingdao. Chin J Parasitol Schistosomiasis Control, 1993, (1): 63.
26. Gong Y, Cao S, Shi X, et al. Survey on *Cryptosporidium* infection in humans in Qingdao. J Qingdao Med Univ, 1997, (2): 28–29.
27. Gong Y, Cao S, Shi X, et al. Survey on *Cryptosporidium* infection in children. J Qingdao Med Univ, 1992, (2): 144–146.
28. Guan J, Cui S, Yan X, Zhang J. Survey of *Cryptosporidium* enteritis in Hohhot. J Inner Mongolia Med Univ, 1989, 27(1): 47–48.
29. Guo J, He Y, Jiao B, et al. *Cryptosporidium* infection analysis in 149 HIV/AIDS patients with chronic diarrhea. Chin J Dermatol Venereol, 2011, 25(11): 868–870.
30. Guo J. Pathogen detection analysis of fecal specimens from HIV-infected patients with chronic diarrhea. Chin Contin Med Educ, 2017, 9(13): 63–64.
31. Guo W, Xue X, Li R, Liang R, Wang Z, Qin J, Duan C, Chen T, Yan X. Epidemiological investigation of *Cryptosporidium* in children with diarrhea in middle Inner Mongolia, China. Acta Trop. 2024 Jun;254:107177. doi: 10.1016/j.actatropica.2024.107177. Epub 2024 Mar 20. PMID: 38518835.
32. Han F, Wang L, Wang R, et al. Discovery of *Cryptosporidium* infection in humans in Nanjing. Chin J Zoonoses, 1989, 5(5): 51.
33. Han F, Xu S. Pathogen diagnosis of *Cryptosporidium* infection. Chin J Parasitol Parasit Dis, 1989, 7(1): 1–3.
34. Han F. Discovery of *Cryptosporidium* infection in infants and young children in China. Chin J Pediatr, 1989, 27(2): 75–76.
35. Hao Y, Liu A, Li H, Zhao Y, Yao L, Yang B, Zhang W, Yang F. Molecular characterization and zoonotic potential of *Cryptosporidium* spp. and Giardia duodenalis in humans and domestic animals in Heilongjiang Province, China. Parasit Vectors. 2024 Mar 25;17(1):155. doi: 10.1186/s13071-024-06219-3. PMID: 38528567; PMCID: PMC10964600.
36. He L, Yan Q, Shi H, et al. Survey of intestinal parasitic infections in suburban populations of Kaifeng. Henan Med Res, 1998, (1): 56–58.
37. He S, Gong X, Liu Y, et al. Examination of *Cryptosporidium* oocysts in stool samples of diarrheal children in Nanchang. J Jiangxi Sci, 1990, (3): 55–58. DOI:10.13990/j.issn1001-3679.1990.03.010.
38. He Z, Fu L, Zhou W, et al. Survey of *Cryptosporidium* infection in rural children in Chibi City, Hubei Province. J Public Health Prev Med, 2013, 24(6): 72–74.
39. Hong L, Yang W, Peng W, et al. Investigation of *Cryptosporidium* and intestinal protozoan infections in humans and animals. J Xiamen Univ (Nat Sci Ed), 1996, (2): 305–308.
40. Hou Q, Chen J, Liu W. *Cryptosporidium* infection and its epidemiological characteristics in children at Xi'an Children’s Hospital. Contemp Med, 2011, 17(24): 53.
41. Hou Y, Li J, Fei Z, et al. Survey of *Cryptosporidium* infection in children in Xi'an. Chin J Parasitol Schistosomiasis Control, 1991, (3): 200.
42. Hu Z, Lu L, Yu Y, et al. Survey and genetic analysis of *Cryptosporidium* infection in HIV-positive populations in Jiangxi Province. Chin J Schistosomiasis Control (Bilingual), 2024, 36(6): 637–642. DOI:10.16250/j.32.1374.2024071
43. Hua W, Wang H, Jiao B, et al. Discussion on *Cryptosporidium* fecal staining techniques in HIV patients. J Clin Lab Med, 2012, 33(1): 47–48.
44. Huang F, Tian Q. Pathogen microbial detection analysis of fecal specimens from 100 HIV-infected patients with chronic diarrhea. Fam Med J, 2018, (11): 117–118.
45. Huang M, Chen S, Wu B, et al. Clinical epidemiological survey of intestinal pathogenic protozoa in children with diarrhea. Chin J Public Health, 1999, (6): 15.
46. Huang M, Guan L, Li D, et al. Survey of *Cryptosporidium* infection among male intravenous drug users. Chin J Zoonoses, 2002, (2): 131–120.
47. Huang M, Guan L, Zhou C, et al. Study of *Cryptosporidium* infection in children with diarrhea. J Hunan Med Univ, 1998, (3): 38–39+51.
48. Huang M, Guan L, Zhou C, et al. Study on *Cryptosporidium* infection in children with diarrhea. J Hunan Med Univ, 1998, (3): 38–39+51.
49. Huang M, Zhou C, Guan L, et al. Study of *Cryptosporidium* infection in adults with diarrhea. Contemp Med J, 1998, (10): 42–43.
50. Ji R, Cui W, Liang R, et al. Analysis of *Cryptosporidium* infection and risk factors in cancer patients. J Weifang Med Univ, 2008, 30(2): 139–141.
51. Jiang JY, Liang D, Wang L, Xiao Y, Liang YF, Ke BX, Su J, Xiao H, Wang T, Zou M, Li HJ, Ke CW. Epidemiological Surveillance: Genetic Diversity of Rotavirus Group A in the Pearl River Delta, Guangdong, China in 2019. Biomed Environ Sci. 2024 Mar 20;37(3):278-293. doi: 10.3967/bes2024.031. PMID: 38582992.
52. Jiang W, Roellig DM, Li N, Wang L, Guo Y, Feng Y, Xiao L. Contribution of hospitals to the occurrence of enteric protists in urban wastewater. Parasitol Res. 2020 Sep;119(9):3033-3040. doi: 10.1007/s00436-020-06834-w. Epub 2020 Aug 4. PMID: 32748039.
53. Jiang Y, Liu L, Yuan Z, Liu A, Cao J, Shen Y. Molecular identification and genetic characteristics of *Cryptosporidium* spp., Giardia duodenalis, and Enterocytozoon bieneusi in human immunodeficiency virus/acquired immunodeficiency syndrome patients in Shanghai, China. Parasit Vectors. 2023 Feb 4;16(1):53. doi: 10.1186/s13071-023-05666-8. PMID: 36739387; PMCID: PMC9899406.
54. Jiang Y, Ren J, Yuan Z, Liu A, Zhao H, Liu H, Chu L, Pan W, Cao J, Lin Y, Shen Y. *Cryptosporidium* *andersoni* as a novel predominant *Cryptosporidium* species in outpatients with diarrhea in Jiangsu Province, China. BMC Infect Dis. 2014 Oct 25;14:555. doi: 10.1186/s12879-014-0555-7. PMID: 25344387; PMCID: PMC4225042.
55. Jiao B, Wang H, Liu Y, Li J, Guo J, Li M, Wan G, Hua W. Clinical features of *Cryptosporidium* infection in AIDS-related chronic diarrhea patients. Chin Med J, 2011, 91(37): 2611–2614.
56. Kong Y. The effect of fecal microbiological examination on the diagnosis of pediatric diarrhea and its guidance on treatment. Renren Health, 2020, (24): 82.
57. Le H. *Cryptosporidium* pollution in rural centralized water supply and infection status in children in Jintan City. Jiangsu J Prev Med, 2016, 27(2): 190–192. DOI:10.13668/j.issn.1006-9070.2016.02.022
58. Le X, Wang H, Gou J, Chen X, Yang G, Yang Q, Li X, Zhou B, Li H, Cai W. Survey of *Cryptosporidium* infection in AIDS patients in Guangdong and Yunnan. Chin J Exper Clin Virol, 2008, 22(5): 339–341.
59. Li F, Xiang X, Yu Z. Study on *Cryptosporidium* infection in chronic severe hepatitis B patients. Chin Med J, 2005, (4): 484–486.
60. Li F, Zhang X, Wu F, et al. Survey on *Cryptosporidium* infection in chronic hepatitis B patients—276 cases of detection report. New Med, 2007, (2): 81–83+68.
61. Li J, Cui X. Survey on intestinal protozoan infections in medical students. Chin J Sch Health, 2005, (4): 333–334.
62. Li J, Zhang X, Ouyang H, et al. Diagnosis of cryptosporidiosis by PCR. Chin J Vet Sci, 1999, (05): 476–478. DOI:10.16303/j.cnki.1005-4545.1999.05.018.
63. Li M, Liu Y, Wang H, et al. Survey of *Cryptosporidium* and bacterial infections in HIV patients with chronic diarrhea. Chin J Public Health, 2012, 28(8): 1099–1101.
64. Li W, He L, Yan Q, et al. Preliminary survey of *Cryptosporidium* in Henan Province. Strait Prev Med, 2000, (5): 4–5.
65. Li W, Shen S. Preliminary survey of *Cryptosporidium* infection in humans and experimental animals. J First Mil Med Univ, 1994, (1): 41.
66. Li Y, Bing Y, Cong F, et al. Survey on *Cryptosporidium* infection in humans in Shenyang. Chin J Zoonoses, 2006, (5): 473+475.
67. Li Z, Wang K, Wang J, et al. Survey of *Cryptosporidium* infection in Anhui Province. J Fourth Mil Med Univ, 2004, (2): 125–127.
68. Liang Q, Liu Q. Analysis of pathogen monitoring results in infants aged 0–1 years with diarrhea. Front Pharmacol, 2018, 8(3): 257–258.
69. Ling X, Chen H, Yue W, et al. Survey of *Cryptosporidium* infection in special human populations. Chin J Parasitol Schistosomiasis Control, 2001, (3): 85.
70. Ling X, Chen H. Clinical observation of *Cryptosporidium* infection combined with bacterial enteritis. J First Mil Med Univ, 2005, (07): 919–920.
71. Liu D, Wang T, Li Y, et al. Survey of HIV/AIDS patients co-infected with *Cryptosporidium* in Xuancheng City. J Paras Dis Infect Dis, 2013, 11(04): 197–200.
72. Liu H, Ni H, Liu S, Shen Y, Wang R, Cao J, Yin J. First report on occurrence and genotypes of Enterocytozoon bieneusi, *Cryptosporidium* spp. and Cyclospora cayetanensis from diarrheal outpatients in Ningbo, Southeast China. Microb Pathog. 2023 Jan;174:105952. doi: 10.1016/j.micpath.2022.105952. Epub 2022 Dec 15. PMID: 36528327.
73. Liu H, Pan N. Pathogen detection analysis of fecal specimens from HIV-infected patients with chronic diarrhea. Mod Med Health Res Electron J, 2017, 1(3): 91.
74. Liu H, Shen Y, Yin J, Yuan Z, Jiang Y, Xu Y, Pan W, Hu Y, Cao J. Prevalence and genetic characterization of *Cryptosporidium*, Enterocytozoon, Giardia and Cyclospora in diarrheal outpatients in China. BMC Infect Dis. 2014 Jan 13;14:25. doi: 10.1186/1471-2334-14-25. PMID: 24410985; PMCID: PMC3925443.
75. Liu M, An W, Xiao S, et al. Survey and analysis of *Cryptosporidium* and Giardia lamblia contamination in the Yangtze River basin. Resour Environ Yangtze Basin, 2021, 30(12): 2866–2872.
76. Liu X, Mao T, Wu P, et al. Molecular epidemiological investigation of *Cryptosporidium* infection in diarrheic infants in Wuhan. Chin J Schistosomiasis Control, 2017, 29(2): 188–191+205. DOI:10.16250/j.32.1374.2017007
77. Liu Y, Liu H, Li K, et al. Survey of common intestinal protozoan infections in residents of Dali Bai Autonomous Prefecture, Yunnan. Chin J Clin Infect Dis, 2023, 16(6): 461–465.
78. Lu J, Li CP. [The survey of *Cryptosporidium* infection among young children in kindergartens in Anhui Province]. Zhongguo Ji Sheng Chong Xue Yu Ji Sheng Chong Bing Za Zhi. 2004 Dec;22(6):331-3. Chinese. PMID: 15830854.
79. Lu J, Li Z, Yang Z, et al. Study on *Cryptosporidium* infection in infants in Huainan area. J Huainan Inst Indust, 2001, (04): 71–72.
80. Lu J, Li Z. Survey of *Cryptosporidium* infection in children at kindergartens in Anhui Province. Chin J Parasitol Parasit Dis, 2004, (6): 13–15.
81. Lu L, Li C, Fan Z, et al. Discovery and epidemiological survey of *Cryptosporidium* in humans and animals in Hunan. Chin J Zoonoses, 1992, (2): 43–44.
82. Lu L, Wu Q, Peng F, et al. Examination of *Cryptosporidium* using iodine staining method. Shaanxi Med Lab Sci, 1997, 12(1): 44.
83. Lu S, Lin A, Chen R, et al. Diagnosis and analysis of *Cryptosporidium* infection in children in Zhejiang Province. Chin J Zoonoses, 2000, (1): 42–44+121.
84. Ma L, Lu Y, Cai Q, et al. Serological survey of *Cryptosporidium* infection in yaks in Qinghai. J Livestock Ecol, 2011, 32(2): 47–49.
85. Miao Z, Zhu X, Lv J, et al. Study on *Cryptosporidium* infection in infants and young children. Med Anim Prev, 1994, 10(3): 205–208.
86. Min H, Chen S, Hu J. Investigation of *Cryptosporidium* infection in children in Xian'an District, Xianning. J Public Health Prev Med, 2014, 25(6): 111–112.
87. Niu Y, Li Y, Yu X. Preliminary survey of *Cryptosporidium* infection in diarrheal patients in Qiqihar. J Qiqihar Med Univ, 2006, (2): 184–185.
88. Pang H, Yang L, Kuang Z, et al. Survey of rotavirus and *Cryptosporidium* infection in diarrheal children at a tertiary hospital in Chengdu. Sichuan Med, 2020, 41(2): 122–125. DOI:10.16252/j.cnki.issn1004-0501-2020.02.003.
89. Pang X, Chen S, Xu H, et al. Serological epidemiological analysis of *Cryptosporidium* infection in HIV/AIDS patients. Chin Trop Med, 2016, 16(11): 1123–1125. DOI:10.13604/j.cnki.46-1064/r.2016.11.20
90. Qian F, Shi M, Shen S, et al. Survey of *Cryptosporidium* infection in adult diarrhea patients with and without HIV. Chin J Misdiagnosis, 2011, 11(3): 752.
91. Qin Y, Liu H, Jiang Y, et al. Molecular identification and genetic analysis of *Cryptosporidium* in diarrheal patients in Ningbo. Chin J Parasitol Parasit Dis, 2023, 41(2): 202–208+212.
92. Rong J, Wu G, Chen L, et al. Epidemiological survey of *Cryptosporidium* in humans in Qiannan, Guizhou. Qiannan Med Univ J, 1999, (1): 52–54.
93. Shen J, Ge J. Survey and analysis of *Cryptosporidium* infection rate in 2018 children in kindergartens. J Pract Pediatr, 1991, 3.
94. Shen L, Li W. Survey of *Cryptosporidium* infection in intravenous drug users in Dali. Chin J Public Health, 2005, (11): 21–22.
95. Song J, Zhao J, Gao H, et al. Serological detection of *Cryptosporidium* infection in patients visiting hospitals in Changchun. Chin J Parasitol Parasit Dis, 2011, 29(3): 239–241.
96. Su H, Huang X, Qin Y, et al. Gene typing survey of *Cryptosporidium* in HIV-infected patients. Med Anim Prev, 2017, 33(2): 151–153.
97. Su H, Huang X, Qin Y, et al. Survey and analysis of *Cryptosporidium* infection in HIV/AIDS patients in Hechi City. Intern Med, 2016, 11(4): 642–643. DOI:10.16121/j.cnki.cn45-1347/r.2016.04.49
98. Su Q, Chen D, Hua X, Chen S, Zhao Z, Huang M, Wan J, Hua Y, Guo Y, Li S. *Cryptosporidium* infection in infants in Fuzhou. Chin J Zoonoses, 1989, 5(5): 35–36.
99. Su Q, Huang M, Gao Q, et al. First report of *Cryptosporidium* cases in Zhangzhou, Fujian Province. Chin J Parasitol Parasit Dis, 1994, 12(1): 77.
100. Su S, Chen G, Wu G, et al. Survey of *Cryptosporidium* infection in diarrheal children in Ganzhou (with a case report). Chin J Parasitol Schistosomiasis Control, 1993, (1): 63–64.
101. Su Y, He L, Song J, et al. Survey of *Cryptosporidium* infection in diarrheal infants in Henan Province. Chin J Parasitol Schistosomiasis Control, 1993, (4): 313.
102. Su Y. Pathogen detection analysis of fecal specimens from HIV-infected patients with chronic diarrhea. China Health Industry, 2014, 11(6): 24–25. DOI:10.16659/j.cnki.1672-5654.2014.06.020
103. Sun T, Liu W, Wang J, et al. Isolation and identification of *Cryptosporidium* from dairy cows in Hefei. Chin J Parasitol Parasit Dis, 2011, 29(6): 447–452.
104. Sun X, Gu G, Gu G, et al. Survey of *Cryptosporidium* in diarrheal patients in Hai'an County. Chin J Public Health, 1992, (8): 350.
105. Sun Y. Survey on *Cryptosporidium* infection and risk factors in children from pastoral areas. China Health Industry, 2015, 12(8): 17–18+21. DOI:10.16659/j.cnki.1672-5654.2015.08.073.
106. Tang X, Liu P, Gao X. Discussion on the detection methods of *Cryptosporidium* in feces of AIDS patients with diarrhea. J Med Clin Res, 2010, 27(5): 847–848.
107. Tao H, Li Y, Zhou X, et al. Survey on intestinal parasitic infections in primary school students from the Dulong ethnic group in Yunnan Province. Chin Trop Med, 2016, 16(10): 1021–1023. DOI:10.13604/j.cnki.46-1064/r.2016.10.18
108. Tian L, Cheng G, Chen J, et al. Survey on intestinal parasitic infections in rural high-prevalence areas of HIV/AIDS in China. Chin J Schistosomiasis Control, 2012, 24(2): 168–172. DOI:10.16250/j.32.1374.2012.02.022
109. Tian L, Wang T, Cheng G, et al. Analysis of *Cryptosporidium* infection in HIV patients and its influencing factors. Chin J Schistosomiasis Control, 2012, 24(1): 54–57+61. DOI:10.16250/j.32.1374.2012.01.029
110. Wan L, He Z, Wang L, et al. Survey of *Cryptosporidium* infection in children swimming in Jingzhou. J Environ Health, 2018, 35(1): 69–71. DOI:10.16241/j.cnki.1001-5914.2018.01.018
111. Wan L, Zhong G, Huang C, et al. Survey on *Cryptosporidium* infection in swimming children in Guilin. Chin J Microecol, 2018, 30(7): 818–820. DOI:10.13381/j.cnki.cjm.201807016
112. Wang C, Zhou X, Zhu M, Yin H, Tang J, Huang Y, Zheng B, Jin Y, Liu Z. The application research of xTAG GPP multiplex PCR in the diagnosis of persistent and chronic diarrhea in children. BMC Pediatr. 2020 Jun 26;20(1):309. doi: 10.1186/s12887-020-02206-6. PMID: 32590971; PMCID: PMC7318512.
113. Wang H, Guo J, Li M, et al. Study on *Cryptosporidium* infection in HIV-related chronic diarrhea patients. J Clin Lab Med, 2015, 36(22): 3300–3301.
114. Wang H, Hua W, Li M, et al. Pathogen microbial detection analysis of fecal specimens from 253 HIV-infected patients with chronic diarrhea. Chin J Exper Clin Infect Dis (Electron Ed), 2012, 6(2): 135–138.
115. Wang H, Jiao B, Tian J, Li M, Guo J, Liu Y, Li X, Wang Y. Detection and analysis of *Cryptosporidium* infection in HIV/AIDS-related chronic diarrhea patients in Beijing, Henan, and Xinjiang. Chin J Epidemiol, 2011, 32(9): 927–929.
116. Wang H, Rong J, Wu G. Survey on *Cryptosporidium* infection in rural residents in Qiannan, Guizhou. Trop Med J, 2006, (6): 717–718.
117. Wang H, Yang Z, Sun D, et al. Survey of *Cryptosporidium* and Giardia lamblia infection in primary school students in a pastoral area of Baotou. J Environ Health, 2020, 10(1): 21–24. DOI:10.13421/j.cnki.hjwsxzz.2020.01.004.
118. Wang K, Xu L, Cai R, et al. Detection of peripheral blood T cell subsets and mIL-2R in *Cryptosporidium* *patients* by BSA system. Chin J Zoonoses, 2003, 19(5): 95–97.
119. Wang KX, Li CP, Wang J, Pan BR. Epidemiological survey of cryptosporidiosis in Anhui Province China. World J Gastroenterol. 2002 Apr;8(2):371-4. doi: 10.3748/wjg.v8.i2.371. PMID: 11925628; PMCID: PMC4658387.
120. Wang L, Cui X, Tong Y, et al. Study on rapid detection methods for *Cryptosporidium* in human and animal feces. J Public Health Prev Med, 2015, 26(4): 26–28.
121. Wang L, Li S, Li L, et al. Establishment and application of RPA-CRISPR/Cas12a visual detection method for *Cryptosporidium parvum*. Chin J Anim Husb Vet Med, 2023, 50(12): 4793–4804. DOI:10.16431/j.cnki.1671-7236.2023.12.002
122. Wang L, Tian X, He Z, et al. Survey on *Cryptosporidium* infection in children in rural areas of China. J Environ Health, 2015, 5(4): 328–330+335. DOI:10.13421/j.cnki.hjwsxzz.2015.04.005
123. Wang L, Xiao L, Duan L, Ye J, Guo Y, Guo M, Liu L, Feng Y. Concurrent infections of Giardia duodenalis, Enterocytozoon bieneusi, and Clostridium difficile in children during a cryptosporidiosis outbreak in a pediatric hospital in China. PLoS Negl Trop Dis. 2013 Sep 12;7(9):e2437. doi: 10.1371/journal.pntd.0002437. PMID: 24069491; PMCID: PMC3772047.
124. Wang L, Zhang H, Zhao X, Zhang L, Zhang G, Guo M, Liu L, Feng Y, Xiao L. Zoonotic *Cryptosporidium* species and Enterocytozoon bieneusi genotypes in HIV-positive patients on antiretroviral therapy. J Clin Microbiol. 2013 Feb;51(2):557-63. doi: 10.1128/JCM.02758-12. Epub 2012 Dec 5. PMID: 23224097; PMCID: PMC3553929.
125. Wang L. Parasitic infections in AIDS patients: Analysis of 62 cases. Chin J Schistosomiasis Control, 1996, 9(2): 134–135.
126. Wang Q, Guo J, Cao Z, et al. Survey of *Cryptosporidium* infection in populations in parts of Anhui Province. Chin J Schistosomiasis Control, 2015, 27(3): 263–267+272. DOI:10.16250/j.32.1374.2015049
127. Wang Q, Zhang J. Investigation on *Cryptosporidium* infection in 1124 children in the Tarim region of Xinjiang. Xinjiang Med, 1995, (3): 187–188.
128. Wang Q, Zhou Y, Lv B, et al. Survey of intestinal parasitic infections in clinical patients in Kaifeng, Henan Province. Trop Med J, 2009, 9(5): 510–514.
129. Wang R, Qi M, Zhao Y, et al. Survey of intestinal parasitic infections in children in Linzhou, Henan Province. Trop Med J, 2009, 9(10): 1184–1187.
130. Wang RJ, Li JQ, Chen YC, Zhang LX, Xiao LH. Widespread occurrence of *Cryptosporidium* infections in patients with HIV/AIDS: Epidemiology, clinical feature, diagnosis, and therapy. Acta Trop. 2018 Nov;187:257-263. doi: 10.1016/j.actatropica.2018.08.018. Epub 2018 Aug 15. PMID: 30118699.
131. Wang T, Wei Z, Zhang Y, Zhang Q, Zhang L, Yu F, Qi M, Zhao W. Molecular detection and genetic characterization of *Cryptosporidium* in kindergarten children in Southern Xinjiang, China. Infect Genet Evol. 2022 Sep;103:105339. doi: 10.1016/j.meegid.2022.105339. Epub 2022 Jul 14. PMID: 35840104.
132. Wang Y, Li N, Guo Y, Wang L, Wang R, Feng Y, Xiao L. Persistent Occurrence of *Cryptosporidium hominis* and Giardia duodenalis Subtypes in a Welfare Institute. Front Microbiol. 2018 Nov 20;9:2830. doi: 10.3389/fmicb.2018.02830. PMID: 30524409; PMCID: PMC6256193.
133. Wang Y, Yu H, Yang J, et al. Survey of intestinal parasitic protozoa in humans in Yunnan Province. Chin J Parasitol Parasit Dis, 1994, (S1): 99–102.
134. Wang Z Y, Zhang Y G, Ma X J, et al. Investigation on common infection of diarrhea-causing parasitic protozoa in Shanghai during 2015-2019[J]. 2021.
135. Wang Z, Ji W, Cheng X, et al. Investigation of intestinal protozoan infections causing diarrhea in vulnerable groups. Chin J Parasitol Schistosomiasis Control, 2005, (4): 301–312.
136. Wei Y. Analysis of microbial pathogens in acute diarrhea in infants. Guide Chin Med, 2014, 12(10): 127–128. DOI:10.15912/j.cnki.gocm.2014.10.156.
137. Xia Y, Wang L, Cui X, et al. Survey on *Cryptosporidium* infection in children in a pastoral area of Inner Mongolia. J Environ Health, 2015, 5(6): 504–506. DOI:10.13421/j.cnki.hjwsxzz.2015.06.005.
138. Xiao S, An W, Chen Z, Zhang D, Yu J, Yang M. The burden of drinking water-associated cryptosporidiosis in China: the large contribution of the immunodeficient population identified by quantitative microbial risk assessment. Water Res. 2012 Sep 1;46(13):4272-80. doi: 10.1016/j.watres.2012.05.012. Epub 2012 May 16. PMID: 22673344.
139. Xiao Y, Luo H, Xiao G, et al. Pathological features of colon biopsy tissues from AIDS patients. Chin J Clin Infect Dis, 2015, 8(4): 327–331.
140. Xie Z, Zhang R, Huang W, et al. Survey of Entamoeba histolytica infection in adults with chronic diarrhea in Ganzhou and clinical study. J Southern Med Univ, 2008, (6): 1035–1036+1040.
141. Xin L, Cui W, Liang R, et al. Survey of *Cryptosporidium* infection in cancer patients. Chin J Pathog Biol, 2007, (4): 307–308+312. DOI:10.13350/j.cjpb.2007.04.033.
142. Xing W, Yang L, Liang S, et al. Investigation of *Cryptosporidium* infection in diarrheal patients in Wenzhou. J Wenzhou Med Univ, 1999, (2): 29–30.
143. Xu H, Lin G, Meng J, et al. Survey of *Cryptosporidium* infection in Longhai City. Chin J Zoonoses, 2005, (4): 282.
144. Xu L, Lu J, Li Z. Epidemiological survey of *Cryptosporidium* infection in children at 29 kindergartens in Anhui Province. Chin J Epidemiol, 2004, (4): 67.
145. Xu L, Wang J, Wang K, Li Z. Survey of *Cryptosporidium* infection in students in Anhui Province. Chin J Sch Health, 2003, 24(4): 347–348.
146. Xu L, Wu G, Xi J, et al. Survey on intestinal parasitic infections in children at a hospital in Zhengzhou. Trop Med J, 2011, 11(1): 17–18+22.
147. Xu N, Liu H, Jiang Y, Yin J, Yuan Z, Shen Y, Cao J. First report of *Cryptosporidium* viatorum and *Cryptosporidium* occultus in humans in China, and of the unique novel C. viatorum subtype XVaA3h. BMC Infect Dis. 2020 Jan 7;20(1):16. doi: 10.1186/s12879-019-4693-9. PMID: 31910816; PMCID: PMC6947842.
148. Xu N, Tang L, Jiang Y, et al. Prediction of *Cryptosporidium* infection trend among rural residents in Binyang, Guangxi using non-equidistant grey model GM(1,1). Chin J Parasitol Parasit Dis, 2019, 37(01): 87–91.
149. Xu Y, Yao F. Survey of *Cryptosporidium* infection in humans in Xuzhou and Huaian regions of Jiangsu Province. Chin J Parasitol Schistosomiasis Control, 1991, 4(1): 42–43.
150. Yan G, Wang L, Wang H, et al. Survey of *Cryptosporidium* infection in rural children in Changping District, Beijing. Chin J Sch Health, 2014, 35(7): 1107–1108. DOI:10.16835/j.cnki.1000-9817.2014.07.057
151. Yang D, Yang Y, Wang Y, Yang Y, Dong S, Chen Y, Jiang Q, Zhou Y. Prevalence and Risk Factors of Ascaris lumbricoides, Trichuris trichiura and *Cryptosporidium* Infections in Elementary School Children in Southwestern China: A School-Based Cross-Sectional Study. Int J Environ Res Public Health. 2018 Aug 22;15(9):1809. doi: 10.3390/ijerph15091809. PMID: 30135364; PMCID: PMC6165538.
152. Yang P, Zhang H, Zhou W, et al. 2015–2016 sampling survey of *Cryptosporidium* in Nanjing. Chin J Schistosomiasis Control, 2017, 29(6): 752–755. DOI:10.16250/j.32.1374.2017134
153. Yang Y, Zhou Y, Cheng W, Pan X, Xiao P, Shi Y, Gao J, Song X, Chen Y, Jiang Q. Prevalence and Determinants of *Cryptosporidium* Infection in an Underdeveloped Rural Region of Southwestern China. Am J Trop Med Hyg. 2017 Mar;96(3):595-601. doi: 10.4269/ajtmh.16-0732. Epub 2017 Apr 6. PMID: 28093538; PMCID: PMC5361533.
154. Yang Y, Zhou YB, Xiao PL, Shi Y, Chen Y, Liang S, Yihuo WL, Song XX, Jiang QW. Prevalence of and risk factors associated with *Cryptosporidium* infection in an underdeveloped rural community of southwest China. Infect Dis Poverty. 2017 Jan 9;6(1):2. doi: 10.1186/s40249-016-0223-9. PMID: 28126012; PMCID: PMC5267368.
155. Yao F, Chen Y. Pediatric *Cryptosporidium* enteritis: Clinical analysis of 66 cases. J Clin Pediatr, 1991, (3): 160–162.
156. Yao Y, Chen H, Liu X, et al. Molecular epidemiological study of *Cryptosporidium* infection in diarrheal children at sentinel hospitals in Guangzhou. Trop Med J, 2014, 14(1): 60–63.
157. Yin J, Zhang X, Chen J, et al. Rapid diagnosis of *Cryptosporidium* using sandwich ELISA. Chin J Parasitol Parasit Dis, 2000, (2): 64.
158. Yu F, Li D, Chang Y, Wu Y, Guo Z, Jia L, Xu J, Li J, Qi M, Wang R, Zhang L. Molecular characterization of three intestinal protozoans in hospitalized children with different disease backgrounds in Zhengzhou, central China. Parasit Vectors. 2019 Nov 15;12(1):543. doi: 10.1186/s13071-019-3800-5. PMID: 31730024; PMCID: PMC6858702.
159. Yu Z, Li F, Zeng Z, Huang Z, Fan Z, Jin Y, Luo W, Xiang X, Deng Q. Prevalence and clinical significance of *Cryptosporidium* infection in patients with hepatitis B virus-associated acute-on-chronic liver failure. Int J Infect Dis. 2011 Dec;15(12):e845-8. doi: 10.1016/j.ijid.2011.08.006. Epub 2011 Oct 12. PMID: 21992928.
160. Zeng S, Xiang Y, Yi S. Respiratory *Cryptosporidium* infection in humans and diagnostic methods. Pract Prev Med, 2003, (01): 103.
161. Zhan W, Chen Y, Jing L, et al. Survey of *Cryptosporidium* infection rate in diarrheal patients in several cities of China. J Dis Control, 2002, (1): 76–77.
162. Zhang B, Yu H, Tao H, et al. Survey of intestinal protozoan infections in the population in Yuanyang County, Yunnan Province. Chin J Schistosomiasis Control, 2002, (6): 22.
163. Zhang B, Yu H, Zhang L, et al. Survey and analysis of *Cryptosporidium* and Giardia infections in diarrheic patients in Yunnan Province. Chin J Parasitol Parasit Dis, 2002, (2): 42–44.
164. Zhang L, Ning C, Yang Z, et al. Investigation on *Cryptosporidium* infection in dairy cows and workers at a dairy farm in Zhengzhou. Chin J Vet Parasitol, 1999, (2): 26–27.
165. Zhang N, Zhang H, Yu X, et al. Molecular epidemiological survey of intestinal protozoan co-infections in patients with gastrointestinal cancers. J Parasitol Med Entomol, 2024, 31(2): 123–128.
166. Zhang R, Li X, Li H, et al. Epidemiological survey of *Cryptosporidium* infection in the population of Yudong, Chongqing. J Paras Dis Infect Dis, 2012, 10(2): 72–74.
167. Zhang SX, Yang CL, Gu WP, Ai L, Serrano E, Yang P, Zhou X, Li SZ, Lv S, Dang ZS, Chen JH, Hu W, Tian LG, Chen JX, Zhou XN. Case-control study of diarrheal disease etiology in individuals over 5 years in southwest China. Gut Pathog. 2016 Nov 16;8:58. doi: 10.1186/s13099-016-0141-1. PMID: 27891182; PMCID: PMC5112671.
168. Zhang X, He Y, Wang Z, et al. Investigation of *Cryptosporidium* infection in diarrheal patients at a comprehensive hospital in Shanghai. Chin Trop Med, 2016, 16(12): 1183–1186. DOI:10.13604/j.cnki.46-1064/r.2016.12.09
169. Zhang X, Hu L, Li D. Study on certain biological characteristics of *Cryptosporidium*. J Vet Univ, 1992, 12(2): 114–118.
170. Zhang Y, Chen J, Pan H, Ma X, Jiang L, Zhu Q, Wu H, Wang Z. Development and Preliminary Application of a Triplex Real-Time Quantitative PCR Assay for the Simultaneous Detection of Entamoeba histolytica, Giardia lamblia, and *Cryptosporidium parvum*. Front Microbiol. 2022 Apr 28;13:888529. doi: 10.3389/fmicb.2022.888529. PMID: 35572640; PMCID: PMC9097023.
171. Zhang Y, Ji W, Liu X, et al. Survey of *Cryptosporidium* infection in children in Tianjin. Chin J Parasitol Schistosomiasis Control, 1993, 6(4): 317.
172. Zhang Y, Luo P, Gao R. Survey of *Cryptosporidium* infection in children with diarrhea at a children’s hospital in Chengdu. J Pract Parasitol, 2001, (2): 72–73.
173. Zhang Y, Yu F, Zhang X, et al. Survey and clinical analysis of *Cryptosporidium* infection in diarrheal children. J Pract Pediatr Clin, 1997, (2): 127.
174. Zhao S. Survey on *Cryptosporidium* occurrence in Kang County. Gansu Sci Technol Inf, 1996, (1): 25.
175. Zhao W, Ren G, Jiang W, et al. Genetic characterizations of *Cryptosporidium* spp. from children with or without diarrhea in Wenzhou, China: high probability of zoonotic transmission[J]. BMC microbiology, 2024, 24(1): 113.
176. Zhao W, Yao L, Zhuang M, Lin YL, Chen XH, Wang L, Song B, Zhao YS, Xiao Y, Zhang FM, Wang FX, Ling H. A baseline epidemiological study of the co-infection of enteric protozoans with human immunodeficiency virus among men who have sex with men from Northeast China. PLoS Negl Trop Dis. 2022 Sep 6;16(9):e0010712. doi: 10.1371/journal.pntd.0010712. PMID: 36067140; PMCID: PMC9447920.
177. Zhao X, Zhang D, Zhang L, et al. Survey of *Cryptosporidium* infection in infants in Harbin. Chin J Parasitol Schistosomiasis Control, 1997, (3): 75.
178. Zheng C, Li W, Cui F, et al. Experimental diagnosis of *Cryptosporidium* in children. Chin J Pediatr, 2000, (6): 32–35.
179. Zheng C, Xiao Z. Survey of *Cryptosporidium* infection in infants and children in Nanping. Chin J Parasitol Schistosomiasis Control, 1993, (1): 64.
180. Zheng H, Wang L, Zhang R, Ding Z. Study on *Cryptosporidium* pollution in rural centralized water supply and infection status in children in a region of Jiangsu Province. J Environ Health, 2015, 5(5): 418–421.
181. Zheng H, Wang Y, Yao Y. Clinical features and 9-year follow-up of 4 cases of infant cryptosporidial enteritis. J Guangzhou Med Coll, 2000, (04): 44–46.
182. Zhou H, Zhu M, Yuan J, et al. Survey of *Cryptosporidium* infection in different populations in Luwan District, Shanghai. Shanghai J Prev Med, 2005, (9): 430–432. DOI:10.19428/j.cnki.sjpm.2005.09.011
183. Zhou Y, Wang Y, Li P, et al. Clinical study of 311 cases of HIV-related chronic diarrhea. Chin J Exper Clin Infect Dis (Electron Ed), 2012, 6(3): 191–194.
184. Zhou Y, Wu L, Yin Q, et al. Study on Clostridium difficile, Entamoeba histolytica, and *Cryptosporidium* infections in chronic diarrhea patients. Chin J Parasitol Parasit Dis, 2019, 37(6): 723–726.
185. Zhou Y. Survey of *Cryptosporidium* infection in diarrheal patients in Heze City, 2002–2003. Endemic Dis Bull, 2006, (2): 38. DOI:10.13215/j.cnki.jbyfkztb.2006.02.015
186. Zhu F, Wang F, Wen W, et al. Survey of *Cryptosporidium* infection in children in Wuhu. Chin J Epidemiol, 1991, 12(5): 286–288.
187. Zhu H, Du X, Yu R, et al. Serological immunological survey of *Cryptosporidium* infection in intravenous drug users. Chin J Schistosomiasis Control, 2008, (5): 364–366. DOI:10.16250/j.32.1374.2008.05.023
188. Zhu J, Zhu M, Wang S, et al. Survey of *Cryptosporidium* infection in cancer patients in Shiyan. Trop Med J, 2010, 10(5): 553–554+569.
189. Zhu M, Song M. Investigation of *Cryptosporidium* infection in children in kindergartens in Shiyan City. Chin J Sch Health, 2007, (11): 1040.
190. Zhu M, Song M. Survey of *Cryptosporidium* infection in primary and secondary school students in Shiyan City. Chin J Sch Health, 2007, (6): 549.
191. Zhu M, Zhu J, Wang S, et al. Survey of *Cryptosporidium* infection in the population of Shiyan City. Chin J Pathog Biol, 2009, 4(9): 685–686. DOI:10.13350/j.cjpb.2009.09.005
192. Zu SX, Li JF, Barrett LJ, Fayer R, Shu SY, McAuliffe JF, Roche JK, Guerrant RL. Seroepidemiologic study of *Cryptosporidium* infection in children from rural communities of Anhui, China and Fortaleza, Brazil. Am J Trop Med Hyg. 1994 Jul;51(1):1-10. doi: 10.4269/ajtmh.1994.51.1. PMID: 8059906.
193. Zuo Y, Chen F, Fang L. Discovery of *Cryptosporidium* in humans and animals in Yunnan and experimental infection study. Chin J Zoonoses, 1990, (3): 34–36.
