# Supplementary material for: Prevalence and risk factors of Cryptosporidium in humans in China: A systematic review and meta-analysis
Source: Research Square preprint supplement (doi:10.21203/rs.3.rs-7425773/v1), 2025-09-03
Supplement: Supplementary file 2 [file 36bed02b6899897fca72348b.docx]

PubMed:

https://pubmed.ncbi.nlm.nih.gov/

Web of Science:

https://www.webofscience.com/

Sciencedirect:

https://www.sciencedirect.com/

CNKI:

https://www.cnki.net/

Wanfang:

https://www.wanfangdata.com.cn/

VIP:

https://qikan.cqvip.com/

**Table S1** Retrieval formulas in six databases in present study.

| Database | Search Details |
| --- | --- |
| PubMed  644 | (*Cryptosporidium* OR cryptosporidiosis) AND (human OR people OR person OR man OR men OR women OR woman OR patient) AND (China and Chinese) |
| Web of Science  832 | #1  TS=(*Cryptosporidium* OR cryptosporidiosis)  #2  TS=(human OR people OR person OR man OR men OR women OR woman OR patient)  #3  TS=(China and Chinese)  Final query = #1 AND #2 AND #3 |
| ScienceDirect  834 | (*Cryptosporidium* OR cryptosporidiosis) AND (human OR people OR person OR man OR men OR women OR woman OR patient) AND (China and Chinese) |
| CNKI  335 | (Theme: human) AND (theme: *Cryptosporidium*) |
| Wanfang  678 | (Theme: human) AND (theme: *Cryptosporidium*) |
| Vip  974 | (Theme: human) AND (theme: *Cryptosporidium*) |
